# Supplementary material for: Enzyme-responsive nanoparticles: enhancing the ability of endolysins to eradicate Staphylococcus aureus biofilm
Source: Royal Society of Chemistry journal article supplement (doi:10.1039/d4tb01122h), 2024-01-01
Supplement: d4tb01122h1.xlsx [file d4tb01122h1.xlsx]

## Sheet: AP Activity-GH15 Time-kill
Formulation code	Code in Figure 5D	Time (h)	AP activity (DEA/ml)
Control-0-rep1-1	Control	0	0.00466771
Control-0-rep1-2	Control	0	0.00408763
Control-0-rep1-3	Control	0	0.00353075
Control-0-rep2-1	Control	0	0.00343618
Control-0-rep2-2	Control	0	0.00518965
Control-0-rep2-3	Control	0	0.00480055
Control-0-rep3-1	Control	0	0.00559341
Control-0-rep3-2	Control	0	0.00545886
Control-0-rep3-3	Control	0	0.0046839
Control-1h-rep1-1	Control	1	0.00338573
Control-1h-rep1-2	Control	1	0.0031421
Control-1h-rep1-3	Control	1	0.00282886
F0-1h-rep1-1	GH15	1	0.000844983
F0-1h-rep1-2	GH15	1	0.00100741
F0-1h-rep1-3	GH15	1	0.00128004
F3w-2-1h-rep1-1	GH15-PP NPs	1	0.00304929
F3w-2-1h-rep1-2	GH15-PP NPs	1	0.00347275
F3w-2-1h-rep1-3	GH15-PP NPs	1	0.00324071
Control-2h-rep1-1	Control	2	0.0046839
Control-2h-rep1-2	Control	2	0.00469466
Control-2h-rep1-3	Control	2	0.00477
F0-2h-rep1-1	GH15	2	0.00667513
F0-2h-rep1-2	GH15	2	0.00388202
F0-2h-rep1-3	GH15	2	0.00263884
F3w-2-2h-rep1-1	GH15-PP NPs	2	0.00458702
F3w-2-2h-rep1-2	GH15-PP NPs	2	0.00480767
F3w-2-2h-rep1-3	GH15-PP NPs	2	0.0048292
Control-4h-rep1-1	Control	4	0.00425448
Control-4h-rep1-2	Control	4	0.004224
Control-4h-rep1-3	Control	4	0.00377983
Control-4h-rep2-1	Control	4	0.00445786
Control-4h-rep2-2	Control	4	0.00455473
Control-4h-rep2-3	Control	4	0.00436099
F0-4h-rep1-1	GH15	4	0.00372322
F0-4h-rep1-2	GH15	4	0.00368838
F0-4h-rep1-3	GH15	4	0.0071721
F0-4h-rep2-1	GH15	4	0.00309629
F0-4h-rep2-2	GH15	4	0.00317701
F0-4h-rep2-3	GH15	4	0.00371519
F3w-2-4h-rep1-1	GH15-PP NPs	4	0.00505139
F3w-2-4h-rep1-2	GH15-PP NPs	4	0.00493381
F3w-2-4h-rep1-3	GH15-PP NPs	4	0.00506009
F3w-2-4h-rep2-1	GH15-PP NPs	4	0.00447401
F3w-2-4h-rep2-2	GH15-PP NPs	4	0.00430179
F3w-2-4h-rep2-3	GH15-PP NPs	4	0.00428027
