# Supplementary material for: Enzyme-responsive nanoparticles: enhancing the ability of endolysins to eradicate Staphylococcus aureus biofilm
Source: Royal Society of Chemistry journal article supplement (doi:10.1039/d4tb01122h), 2024-01-01
Supplement: d4tb01122h2.xlsx [file d4tb01122h2.xlsx]

## Sheet: AP Activity-M23 Time-kill
Formulation code	Code in Figure 4D	Time (h)	AP activity (DEA/ml)
Control-0-rep1-1	Control	0	0.00460754
Control-0-rep1-2	Control	0	0.00458919
Control-0-rep1-3	Control	0	0.00423445
Control-0-rep2-1	Control	0	0.00718838
Control-0-rep2-2	Control	0	0.00733803
Control-0-rep2-3	Control	0	0.00723826
Control-0-rep3-1	Control	0	0.00635958
Control-0-rep3-2	Control	0	0.006526
Control-0-rep3-3	Control	0	0.00593759
Control-1h-rep1-1	Control	1	0.0043262
Control-1h-rep1-2	Control	1	0.00466259
Control-1h-rep1-3	Control	1	0.0042528
Control-1h-rep2-1	Control	1	0.00647897
Control-1h-rep2-2	Control	1	0.0060245
Control-1h-rep2-3	Control	1	0.00622956
F6hcl-1h-rep1-1	M23	1	0.00431397
F6hcl-1h-rep1-2	M23	1	0.00424669
F6hcl-1h-rep1-3	M23	1	0.00396534
F6hcl-1h-rep2-1	M23	1	0.00544255
F6hcl-1h-rep2-2	M23	1	0.00496592
F6hcl-1h-rep2-3	M23	1	0.00479964
F6hcl-7-1h-rep1-1	M23-PP NPs	1	0.00526809
F6hcl-7-1h-rep1-2	M23-PP NPs	1	0.00537207
F6hcl-7-1h-rep1-3	M23-PP NPs	1	0.0036106
F6hcl-7-1h-rep2-1	M23-PP NPs	1	0.00695006
F6hcl-7-1h-rep2-2	M23-PP NPs	1	0.00621294
F6hcl-7-1h-rep2-3	M23-PP NPs	1	0.0055922
Control-2h-rep1-1	Control	2	0.00634041
Control-2h-rep1-2	Control	2	0.00647897
Control-2h-rep1-3	Control	2	0.00654548
Control-2h-rep2-1	Control	2	0.00542645
Control-2h-rep2-2	Control	2	0.00564636
Control-2h-rep2-3	Control	2	0.00540268
F6hcl-2h-rep1-1	M23	2	0.00640137
F6hcl-2h-rep1-2	M23	2	0.00598016
F6hcl-2h-rep1-3	M23	2	0.00498808
F6hcl-2h-rep2-1	M23	2	0.00518871
F6hcl-2h-rep2-2	M23	2	0.00422585
F6hcl-2h-rep2-3	M23	2	0.00407132
F6hcl-7-2h-rep1-1	M23-PP NPs	2	0.00696115
F6hcl-7-2h-rep1-2	M23-PP NPs	2	0.00682259
F6hcl-7-2h-rep1-3	M23-PP NPs	2	0.00663415
F6hcl-7-2h-rep2-1	M23-PP NPs	2	0.00542645
F6hcl-7-2h-rep2-2	M23-PP NPs	2	0.00562853
F6hcl-7-2h-rep2-3	M23-PP NPs	2	0.00512333
Control-4h-rep1-1	Control	4	0.00612779
Control-4h-rep1-2	Control	4	0.00630609
Control-4h-rep1-3	Control	4	0.00571174
F6hcl-2h-rep1-1	M23	4	0.00495097
F6hcl-2h-rep1-2	M23	4	0.00451709
F6hcl-2h-rep1-3	M23	4	0.00426746
F6hcl-7-2h-rep1-1	M23-PP NPs	4	0.00544428
F6hcl-7-2h-rep1-2	M23-PP NPs	4	0.00520059
F6hcl-7-2h-rep1-3	M23-PP NPs	4	0.00527192
