# Supplementary material for: Enzyme-responsive nanoparticles: enhancing the ability of endolysins to eradicate Staphylococcus aureus biofilm
Source: Royal Society of Chemistry journal article supplement (doi:10.1039/d4tb01122h), 2024-01-01
Supplement: d4tb01122h3.xlsx [file d4tb01122h3.xlsx]

## Sheet: Cytotoxicity towards Caco2 
Formulation code	Code in Figure 2B	Cation	Ratio cation to PP	Concentration (nM)	Viability (%)
F0-0.312-rep1	GH15	GH15	NA	312	96.67
F0-0.312-rep2	GH15	GH15	NA	312	94.66
F0-0.312-rep3	GH15	GH15	NA	312	88.29
F0-0.312-rep4	GH15	GH15	NA	312	93.92
F0-0.312-rep5	GH15	GH15	NA	312	86.4
F0-0.156-rep1	GH15	GH15	NA	156	87.43
F0-0.156-rep2	GH15	GH15	NA	156	90.66
F0-0.156-rep3	GH15	GH15	NA	156	87.6
F0-0.156-rep4	GH15	GH15	NA	156	92.08
F0-0.156-rep5	GH15	GH15	NA	156	91.52
F0-0.078-rep1	GH15	GH15	NA	78	95.95
F0-0.078-rep2	GH15	GH15	NA	78	92.78
F0-0.078-rep3	GH15	GH15	NA	78	90.45
F0-0.078-rep4	GH15	GH15	NA	78	97.49
F0-0.078-rep5	GH15	GH15	NA	78	92.05
F0-0.039-rep1	GH15	GH15	NA	39	91.25
F0-0.039-rep2	GH15	GH15	NA	39	93.11
F0-0.039-rep3	GH15	GH15	NA	39	96.19
F0-0.039-rep4	GH15	GH15	NA	39	96.04
F0-0.039-rep5	GH15	GH15	NA	39	99.03
F1w-2-0.312-rep1	GH15-PP NPs	GH15	1:5	312	94.9
F1w-2-0.312-rep2	GH15-PP NPs	GH15	1:5	312	87.63
F1w-2-0.312-rep3	GH15-PP NPs	GH15	1:5	312	105.13
F1w-2-0.312-rep4	GH15-PP NPs	GH15	1:5	312	102.16
F1w-2-0.312-rep5	GH15-PP NPs	GH15	1:5	312	97.03
F1w-2-0.156-rep1	GH15-PP NPs	GH15	1:5	156	102.8
F1w-2-0.156-rep2	GH15-PP NPs	GH15	1:5	156	112.89
F1w-2-0.156-rep3	GH15-PP NPs	GH15	1:5	156	114.95
F1w-2-0.156-rep4	GH15-PP NPs	GH15	1:5	156	110.82
F1w-2-0.156-rep5	GH15-PP NPs	GH15	1:5	156	111.77
F1w-2-0.078-rep1	GH15-PP NPs	GH15	1:5	78	107.66
F1w-2-0.078-rep2	GH15-PP NPs	GH15	1:5	78	113.34
F1w-2-0.078-rep3	GH15-PP NPs	GH15	1:5	78	114.05
F1w-2-0.078-rep4	GH15-PP NPs	GH15	1:5	78	119.76
F1w-2-0.078-rep5	GH15-PP NPs	GH15	1:5	78	106.07
F1w-2-0.039-rep1	GH15-PP NPs	GH15	1:5	39	112.68
F1w-2-0.039-rep2	GH15-PP NPs	GH15	1:5	39	116.73
F1w-2-0.039-rep3	GH15-PP NPs	GH15	1:5	39	109.02
F1w-2-0.039-rep4	GH15-PP NPs	GH15	1:5	39	111.62
F1w-2-0.039-rep5	GH15-PP NPs	GH15	1:5	39	118.67
F6hcl-0.312-rep1	M23	M23	NA	312	82.05
F6hcl-0.312-rep2	M23	M23	NA	312	84.32
F6hcl-0.312-rep3	M23	M23	NA	312	84.77
F6hcl-0.312-rep4	M23	M23	NA	312	83.46
F6hcl-0.312-rep5	M23	M23	NA	312	82.43
F6hcl-0.156-rep1	M23	M23	NA	156	80.96
F6hcl-0.156-rep2	M23	M23	NA	156	84.88
F6hcl-0.156-rep3	M23	M23	NA	156	88.53
F6hcl-0.156-rep4	M23	M23	NA	156	92.32
F6hcl-0.156-rep5	M23	M23	NA	156	86.03
F6hcl-0.078-rep1	M23	M23	NA	78	88.79
F6hcl-0.078-rep2	M23	M23	NA	78	92.17
F6hcl-0.078-rep3	M23	M23	NA	78	88.04
F6hcl-0.078-rep4	M23	M23	NA	78	91.9
F6hcl-0.078-rep5	M23	M23	NA	78	97.7
F6hcl-0.039-rep1	M23	M23	NA	39	93.65
F6hcl-0.039-rep2	M23	M23	NA	39	92.08
F6hcl-0.039-rep3	M23	M23	NA	39	92.67
F6hcl-0.039-rep4	M23	M23	NA	39	95.63
F6hcl-0.039-rep5	M23	M23	NA	39	91.06
F6hcl-7-0.312	M23-PP NPs	M23	1:7	312	99
F6hcl-7-0.312	M23-PP NPs	M23	1:7	312	89.5
F6hcl-7-0.312	M23-PP NPs	M23	1:7	312	87.95
F6hcl-7-0.312	M23-PP NPs	M23	1:7	312	94.57
F6hcl-7-0.312	M23-PP NPs	M23	1:7	312	88.66
F6hcl-7-0.312	M23-PP NPs	M23	1:7	156	95.32
F6hcl-7-0.312	M23-PP NPs	M23	1:7	156	96.1
F6hcl-7-0.312	M23-PP NPs	M23	1:7	156	93.76
F6hcl-7-0.312	M23-PP NPs	M23	1:7	156	99.67
F6hcl-7-0.312	M23-PP NPs	M23	1:7	156	99.35
F6hcl-7-0.312	M23-PP NPs	M23	1:7	78	96.72
F6hcl-7-0.312	M23-PP NPs	M23	1:7	78	99.43
F6hcl-7-0.312	M23-PP NPs	M23	1:7	78	99.23
F6hcl-7-0.312	M23-PP NPs	M23	1:7	78	96.33
F6hcl-7-0.312	M23-PP NPs	M23	1:7	78	105.28
F6hcl-7-0.312	M23-PP NPs	M23	1:7	39	104.25
F6hcl-7-0.312	M23-PP NPs	M23	1:7	39	108.07
F6hcl-7-0.312	M23-PP NPs	M23	1:7	39	110.83
F6hcl-7-0.312	M23-PP NPs	M23	1:7	39	93.83
F6hcl-7-0.312	M23-PP NPs	M23	1:7	39	106.49

## Sheet: Cytotoxicity towards Hela
Formulation code	Code in Figure 2B	Cation	Ratio cation to PP	Concentration (nM)	Viability (%)
F0-0.312-rep1	GH15	GH15	NA	312	0.964595
F0-0.312-rep2	GH15	GH15	NA	312	0.901834
F0-0.312-rep3	GH15	GH15	NA	312	0.880262
F0-0.312-rep4	GH15	GH15	NA	312	0.934819
F0-0.312-rep5	GH15	GH15	NA	312	0.860284
F0-0.156-rep1	GH15	GH15	NA	156	0.899773
F0-0.156-rep2	GH15	GH15	NA	156	0.985253
F0-0.156-rep3	GH15	GH15	NA	156	0.869614
F0-0.156-rep4	GH15	GH15	NA	156	0.895437
F0-0.156-rep5	GH15	GH15	NA	156	1.01033
F0-0.078-rep1	GH15	GH15	NA	78	0.968463
F0-0.078-rep2	GH15	GH15	NA	78	0.869274
F0-0.078-rep3	GH15	GH15	NA	78	0.909464
F0-0.078-rep4	GH15	GH15	NA	78	0.98995
F0-0.078-rep5	GH15	GH15	NA	78	0.995264
F0-0.039-rep1	GH15	GH15	NA	39	0.845407
F0-0.039-rep2	GH15	GH15	NA	39	0.963107
F0-0.039-rep3	GH15	GH15	NA	39	0.92279
F0-0.039-rep4	GH15	GH15	NA	39	0.938879
F0-0.039-rep5	GH15	GH15	NA	39	1.00606
F1w-2-0.312-rep1	GH15-PP NPs	GH15	1:5	312	0.930399
F1w-2-0.312-rep2	GH15-PP NPs	GH15	1:5	312	0.831507
F1w-2-0.312-rep3	GH15-PP NPs	GH15	1:5	312	0.864641
F1w-2-0.312-rep4	GH15-PP NPs	GH15	1:5	312	0.892207
F1w-2-0.312-rep5	GH15-PP NPs	GH15	1:5	312	0.905681
F1w-2-0.156-rep1	GH15-PP NPs	GH15	1:5	156	0.871973
F1w-2-0.156-rep2	GH15-PP NPs	GH15	1:5	156	0.937285
F1w-2-0.156-rep3	GH15-PP NPs	GH15	1:5	156	0.906552
F1w-2-0.156-rep4	GH15-PP NPs	GH15	1:5	156	0.95263
F1w-2-0.156-rep5	GH15-PP NPs	GH15	1:5	156	0.986188
F1w-2-0.078-rep1	GH15-PP NPs	GH15	1:5	78	0.953288
F1w-2-0.078-rep2	GH15-PP NPs	GH15	1:5	78	0.854758
F1w-2-0.078-rep3	GH15-PP NPs	GH15	1:5	78	0.924958
F1w-2-0.078-rep4	GH15-PP NPs	GH15	1:5	78	0.894842
F1w-2-0.078-rep5	GH15-PP NPs	GH15	1:5	78	0.918731
F1w-2-0.039-rep1	GH15-PP NPs	GH15	1:5	39	0.921515
F1w-2-0.039-rep2	GH15-PP NPs	GH15	1:5	39	0.955499
F1w-2-0.039-rep3	GH15-PP NPs	GH15	1:5	39	0.97027
F1w-2-0.039-rep4	GH15-PP NPs	GH15	1:5	39	1.0043
F1w-2-0.039-rep5	GH15-PP NPs	GH15	1:5	39	0.959494
F6hcl-0.312-rep1	M23	M23	NA	312	1.01333
F6hcl-0.312-rep2	M23	M23	NA	312	0.907233
F6hcl-0.312-rep3	M23	M23	NA	312	0.919007
F6hcl-0.312-rep4	M23	M23	NA	312	0.925935
F6hcl-0.312-rep5	M23	M23	NA	312	0.93958
F6hcl-0.156-rep1	M23	M23	NA	156	0.932035
F6hcl-0.156-rep2	M23	M23	NA	156	1.03127
F6hcl-0.156-rep3	M23	M23	NA	156	1.01003
F6hcl-0.156-rep4	M23	M23	NA	156	0.997325
F6hcl-0.156-rep5	M23	M23	NA	156	1.06678
F6hcl-0.078-rep1	M23	M23	NA	78	0.986337
F6hcl-0.078-rep2	M23	M23	NA	78	0.925255
F6hcl-0.078-rep3	M23	M23	NA	78	0.947231
F6hcl-0.078-rep4	M23	M23	NA	78	0.971417
F6hcl-0.078-rep5	M23	M23	NA	78	0.946487
F6hcl-0.039-rep1	M23	M23	NA	39	0.88887
F6hcl-0.039-rep2	M23	M23	NA	39	0.990588
F6hcl-0.039-rep3	M23	M23	NA	39	0.933225
F6hcl-0.039-rep4	M23	M23	NA	39	1.04276
F6hcl-0.039-rep5	M23	M23	NA	39	1.02704
F6hcl-7-0.312	M23-PP NPs	M23	1:7	312	0.930717
F6hcl-7-0.312	M23-PP NPs	M23	1:7	312	0.823814
F6hcl-7-0.312	M23-PP NPs	M23	1:7	312	0.769214
F6hcl-7-0.312	M23-PP NPs	M23	1:7	312	0.701544
F6hcl-7-0.312	M23-PP NPs	M23	1:7	312	0.732552
F6hcl-7-0.312	M23-PP NPs	M23	1:7	156	0.937178
F6hcl-7-0.312	M23-PP NPs	M23	1:7	156	0.905702
F6hcl-7-0.312	M23-PP NPs	M23	1:7	156	0.971311
F6hcl-7-0.312	M23-PP NPs	M23	1:7	156	0.969568
F6hcl-7-0.312	M23-PP NPs	M23	1:7	156	1.02459
F6hcl-7-0.312	M23-PP NPs	M23	1:7	78	0.908742
F6hcl-7-0.312	M23-PP NPs	M23	1:7	78	0.904321
F6hcl-7-0.312	M23-PP NPs	M23	1:7	78	0.922981
F6hcl-7-0.312	M23-PP NPs	M23	1:7	78	0.958283
F6hcl-7-0.312	M23-PP NPs	M23	1:7	78	0.935563
F6hcl-7-0.312	M23-PP NPs	M23	1:7	39	0.924681
F6hcl-7-0.312	M23-PP NPs	M23	1:7	39	1.00194
F6hcl-7-0.312	M23-PP NPs	M23	1:7	39	0.893439
F6hcl-7-0.312	M23-PP NPs	M23	1:7	39	1.07277
F6hcl-7-0.312	M23-PP NPs	M23	1:7	39	0.932163
