# Supplementary material for: Enzyme-responsive nanoparticles: enhancing the ability of endolysins to eradicate Staphylococcus aureus biofilm
Source: Royal Society of Chemistry journal article supplement (doi:10.1039/d4tb01122h), 2024-01-01
Supplement: d4tb01122h4.xlsx [file d4tb01122h4.xlsx]

## Sheet: Enyme-Triggered activity
Formulation code	Code in Figure 6	Pre-Treatment	Treatment	Colony forming units per mm 2
Control-rep1-1	Control	1 h Water	2 h Water	35
Control-rep1-2	Control	1 h Water	2 h Water	149
Control-rep2-1	Control	1 h Water	2 h Water	170
Control-rep2-2	Control	1 h Water	2 h Water	62.3
Control-rep3-1	Control	1 h Water	2 h Water	94.3
Control-rep3-2	Control	1 h Water	2 h Water	38.4
Control/Pi-rep1-1	Control + Pi	1 h Pi	2 h Water	22.8
Control/Pi-rep1-2	Control + Pi	1 h Pi	2 h Water	27.3
Control/Pi-rep2-1	Control + Pi	1 h Pi	2 h Water	32.4
Control/Pi-rep2-2	Control + Pi	1 h Pi	2 h Water	36
Control/Pi-rep3-1	Control + Pi	1 h Pi	2 h Water	42.3
Control/Pi-rep3-2	Control + Pi	1 h Pi	2 h Water	30.9
F6hcl-rep1-1	M23	1 h Water	2 h M23	14.2
F6hcl-rep1-2	M23	1 h Water	2 h M23	16.8
F6hcl-rep2-1	M23	1 h Water	2 h M23	279
F6hcl-rep2-2	M23	1 h Water	2 h M23	1.06
F6hcl-rep3-1	M23	1 h Water	2 h M23	6.86
F6hcl-rep3-2	M23	1 h Water	2 h M23	13.6
F6hcl/Pi-rep1-1	M23 + Pi	1 h Pi	2 h M23	3.68
F6hcl/Pi-rep1-2	M23 + Pi	1 h Pi	2 h M23	1.63
F6hcl/Pi-rep2-1	M23 + Pi	1 h Pi	2 h M23	1.13
F6hcl/Pi-rep2-2	M23 + Pi	1 h Pi	2 h M23	Below detection limit
F6hcl/Pi-rep3-1	M23 + Pi	1 h Pi	2 h M23	Below detection limit
F6hcl/Pi-rep3-2	M23 + Pi	1 h Pi	2 h M23	Below detection limit
F6hcl-7-rep1-1	M23-PP NPs	1 h Water	2 h M23-PP NPs	Below detection limit
F6hcl-7-rep1-2	M23-PP NPs	1 h Water	2 h M23-PP NPs	Below detection limit
F6hcl-7-rep2-1	M23-PP NPs	1 h Water	2 h M23-PP NPs	Below detection limit
F6hcl-7-rep2-2	M23-PP NPs	1 h Water	2 h M23-PP NPs	0.142
F6hcl-7-rep3-1	M23-PP NPs	1 h Water	2 h M23-PP NPs	0.142
F6hcl-7-rep3-2	M23-PP NPs	1 h Water	2 h M23-PP NPs	0.0708
F6hcl-7/Pi-rep1-1	M23-PP NPs + Pi	1 h Pi	2 h M23-PP NPs	29.7
F6hcl-7/Pi-rep1-2	M23-PP NPs + Pi	1 h Pi	2 h M23-PP NPs	5.24
F6hcl-7/Pi-rep2-1	M23-PP NPs + Pi	1 h Pi	2 h M23-PP NPs	12.9
F6hcl-7/Pi-rep2-2	M23-PP NPs + Pi	1 h Pi	2 h M23-PP NPs	93.6
F6hcl-7/Pi-rep3-1	M23-PP NPs + Pi	1 h Pi	2 h M23-PP NPs	3.11
F6hcl-7/Pi-rep3-2	M23-PP NPs + Pi	1 h Pi	2 h M23-PP NPs	2.34
