# Supplementary material for: Enzyme-responsive nanoparticles: enhancing the ability of endolysins to eradicate Staphylococcus aureus biofilm
Source: Royal Society of Chemistry journal article supplement (doi:10.1039/d4tb01122h), 2024-01-01
Supplement: d4tb01122h5.xlsx [file d4tb01122h5.xlsx]

## Sheet: GH15 and GH15-PP time-kill
Formulation code	Code in Figure 5A	Time (h)	Log of Colony forming units per mm 2
Control-0-rep1-1	Control	0	3.16
Control-0-rep1-2	Control	0	3.7
Control-0-rep2-1	Control	0	3.57
Control-0-rep2-2	Control	0	3.91
Control-0-rep3-1	Control	0	3.58
Control-0-rep3-2	Control	0	3.75
Control-1h-rep1-1	Control	1	2.88
Control-1h-rep1-2	Control	1	2.95
F0-1h-rep1-1	GH15	1	2.87
F0-1h-rep1-2	GH15	1	3.27
F3w-2-1h-rep1-1	GH15-PP NPs	1	2.87
F3w-2-1h-rep1-2	GH15-PP NPs	1	2.3
Control-2h-rep1-1	Control	2	3.19
Control-2h-rep1-2	Control	2	3.11
F0-2h-rep1-1	GH15	2	3.69
F0-2h-rep1-2	GH15	2	3.23
F3w-2-2h-rep1-1	GH15-PP NPs	2	2.42
F3w-2-2h-rep1-2	GH15-PP NPs	2	2.93
Control-4h-rep1-1	Control	4	2.29
Control-4h-rep1-2	Control	4	2.15
Control-4h-rep2-1	Control	4	2.67
Control-4h-rep2-2	Control	4	2.93
F0-4h-rep1-1	GH15	4	2.51
F0-4h-rep1-2	GH15	4	2.26
F0-4h-rep2-1	GH15	4	2.78
F0-4h-rep2-2	GH15	4	2.74
F3w-2-4h-rep1-1	GH15-PP NPs	4	1.72
F3w-2-4h-rep1-2	GH15-PP NPs	4	1.51
F3w-2-4h-rep2-1	GH15-PP NPs	4	1.57
F3w-2-4h-rep2-2	GH15-PP NPs	4	1.29
