# Supplementary material for: Enzyme-responsive nanoparticles: enhancing the ability of endolysins to eradicate Staphylococcus aureus biofilm
Source: Royal Society of Chemistry journal article supplement (doi:10.1039/d4tb01122h), 2024-01-01
Supplement: d4tb01122h6.xlsx [file d4tb01122h6.xlsx]

## Sheet: M23 and M23-PP-NPs Time-kill
Formulation code	Code in Figure 4A	Time (h)	Log of Colony forming units per mm 2
Control-0-rep1-1	Control	0	1.61
Control-0-rep1-2	Control	0	1.75
Control-0-rep2-1	Control	0	3.12
Control-0-rep2-2	Control	0	3.14
Control-0-rep3-1	Control	0	3.26
Control-0-rep3-2	Control	0	3.12
Control-1h-rep1-1	Control	1	2.26
Control-1h-rep1-2	Control	1	2.1
Control-1h-rep2-1	Control	1	2.41
Control-1h-rep2-2	Control	1	3
F6hcl-1h-rep1-1	M23	1	1.8
F6hcl-1h-rep1-2	M23	1	1.52
F6hcl-1h-rep2-1	M23	1	2.99
F6hcl-1h-rep2-2	M23	1	2.89
F6hcl-7-1h-rep1-1	M23-PP NPs	1	below detection limit
F6hcl-7-1h-rep1-2	M23-PP NPs	1	0.151
F6hcl-7-1h-rep2-1	M23-PP NPs	1	0.525
F6hcl-7-1h-rep2-2	M23-PP NPs	1	1.16
Control-2h-rep1-1	Control	2	3.24
Control-2h-rep1-2	Control	2	3.18
Control-2h-rep2-1	Control	2	2.95
Control-2h-rep2-2	Control	2	3.09
F6hcl-2h-rep1-1	M23	2	1.39
F6hcl-2h-rep1-2	M23	2	1.88
F6hcl-2h-rep2-1	M23	2	2.13
F6hcl-2h-rep2-2	M23	2	1.73
F6hcl-7-2h-rep1-1	M23-PP NPs	2	0.208
F6hcl-7-2h-rep1-2	M23-PP NPs	2	0.628
F6hcl-7-2h-rep2-1	M23-PP NPs	2	0.707
F6hcl-7-2h-rep2-2	M23-PP NPs	2	0.102
Control-4h-rep1-1	Control	4	2.54
Control-4h-rep1-2	Control	4	2.66
F6hcl-4h-rep2-1	M23	4	2.44
F6hcl-4h-rep2-2	M23	4	2.26
F6hcl-7-4h-rep1-1	M23-PP NPs	4	below detection limit
F6hcl-7-4h-rep1-2	M23-PP NPs	4	below detection limit
