# Supplementary material for: Enzyme-responsive nanoparticles: enhancing the ability of endolysins to eradicate Staphylococcus aureus biofilm
Source: Royal Society of Chemistry journal article supplement (doi:10.1039/d4tb01122h), 2024-01-01
Supplement: d4tb01122h7.xlsx [file d4tb01122h7.xlsx]

## Sheet: MIC and MBC
Sample code	Code in Figure 2A	Ratio cation to PP (µMol)	MIC (nMol)	MBC (nMol)
F0-rep1-1	GH15	NA	312.5	1250
F0-rep1-2	GH15	NA	312.5	1250
F0-rep2-1	GH15	NA	312.5	1250
F0-rep2-2	GH15	NA	312.5	1250
F0-rep3-1	GH15	NA	312.5	1250
F0-rep3-2	GH15	NA	312.5	1250
F3w-2-rep1-1	GH15-PP NPs	1:5	78.3	312.5
F3w-2-rep1-2	GH15-PP NPs	1:5	78.3	312.5
F3w-2-rep2-1	GH15-PP NPs	1:5	78.3	312.5
F3w-2-rep2-2	GH15-PP NPs	1:5	78.3	312.5
F3w-2-rep3-1	GH15-PP NPs	1:5	78.3	312.5
F3w-2-rep3-2	GH15-PP NPs	1:5	78.3	312.5
F6hcl-rep1-1	M23	NA	312.5	312.5
F6hcl-rep1-2	M23	NA	312.5	312.5
F6hcl-rep2-1	M23	NA	312.5	312.5
F6hcl-rep2-2	M23	NA	312.5	312.5
F6hcl-rep3-1	M23	NA	312.5	312.5
F6hcl-rep3-2	M23	NA	312.5	312.5
F6hcl-7-rep1-1	M23-PP NPs Contr	1:7	39.1	39.1
F6hcl-7-rep1-2	M23-PP NPs Contr	1:7	39.1	39.1
F6hcl-7-rep2-1	M23-PP NPs Contr	1:7	39.1	39.1
F6hcl-7-rep2-2	M23-PP NPs Contr	1:7	39.1	39.1
F6hcl-7-rep3-1	M23-PP NPs Contr	1:7	39.1	39.1
F6hcl-7-rep3-2	M23-PP NPs Contr	1:7	39.1	39.1
