# Supplementary material for: Enzyme-responsive nanoparticles: enhancing the ability of endolysins to eradicate Staphylococcus aureus biofilm
Source: Royal Society of Chemistry journal article supplement (doi:10.1039/d4tb01122h), 2024-01-01
Supplement: d4tb01122h8.xlsx [file d4tb01122h8.xlsx]

## Sheet: M23-PP-NPs protective effect
Sample code	Code in Figure 3	Ratio cation to PP (µMol)	Treatment	MIC (nMol)
F6hcl-Control-rep1-1	M23 Contr	NA	Inactivated TrypLE, 20 min	312.5
F6hcl-Control-rep1-2	M23 Contr	NA	Inactivated TrypLE, 20 min	312.5
F6hcl-Control-rep2-1	M23 Contr	NA	Inactivated TrypLE, 20 min	312.5
F6hcl-Control-rep2-2	M23 Contr	NA	Inactivated TrypLE, 20 min	312.5
F6hcl-Control-rep3-1	M23 Contr	NA	Inactivated TrypLE, 20 min	156.25
F6hcl-Control-rep3-2	M23 Contr	NA	Inactivated TrypLE, 20 min	156.25
F6hcl-Treated-rep1-1	M23 Tr	NA	TrypLE, 20 min	625
F6hcl-Treated-rep1-2	M23 Tr	NA	TrypLE, 20 min	625
F6hcl-Treated-rep2-1	M23 Tr	NA	TrypLE, 20 min	625
F6hcl-Treated-rep2-2	M23 Tr	NA	TrypLE, 20 min	625
F6hcl-Treated-rep3-1	M23 Tr	NA	TrypLE, 20 min	625
F6hcl-Treated-rep3-2	M23 Tr	NA	TrypLE, 20 min	625
F6hcl-7-Control-rep1-1	M23-PP NPs Contr	1:7	Inactivated TrypLE, 20 min	78.125
F6hcl-7-Control-rep1-2	M23-PP NPs Contr	1:7	Inactivated TrypLE, 20 min	78.125
F6hcl-7-Control-rep2-1	M23-PP NPs Contr	1:7	Inactivated TrypLE, 20 min	78.125
F6hcl-7-Control-rep2-2	M23-PP NPs Contr	1:7	Inactivated TrypLE, 20 min	78.125
F6hcl-7-Control-rep3-1	M23-PP NPs Contr	1:7	Inactivated TrypLE, 20 min	39.05
F6hcl-7-Control-rep3-2	M23-PP NPs Contr	1:7	Inactivated TrypLE, 20 min	39.05
F6hcl-7-Treated-rep1-1	M23-PP NPs Tr	1:7	TrypLE, 20 min	78.125
F6hcl-7-Treated-rep1-2	M23-PP NPs Tr	1:7	TrypLE, 20 min	78.125
F6hcl-7-Treated-rep2-1	M23-PP NPs Tr	1:7	TrypLE, 20 min	78.125
F6hcl-7-Treated-rep2-2	M23-PP NPs Tr	1:7	TrypLE, 20 min	78.125
F6hcl-7-Treated-rep3-1	M23-PP NPs Tr	1:7	TrypLE, 20 min	39.05
F6hcl-7-Treated-rep3-2	M23-PP NPs Tr	1:7	TrypLE, 20 min	39.05
