# Supplementary material for: Enzyme-responsive nanoparticles: enhancing the ability of endolysins to eradicate Staphylococcus aureus biofilm
Source: Royal Society of Chemistry journal article supplement (doi:10.1039/d4tb01122h), 2024-01-01
Supplement: d4tb01122h10.xlsx [file d4tb01122h10.xlsx]

## Sheet: PGH-PP-NPs_Screening conditions
Formulation code	Cation concentration	Cation net charge at (pH)	PP concentration	Ratio cation to PP (µMol)	Media used for formulation	Ultrasonication	Formulation ionic strength	Visual appearance of the sample	Size (nm)	PDI
F0	GH15 5µM	+3.644 (7.4)	0	NA	Water	No	0.046925	Transparent	NA	NA
F1pbs	GH15 5µM	+3.644 (7.4)	15 µM	1:3	PBS pH 7.4	Yes	0.59121	Macroscopic phase separation	NA	NA
F2pbs	GH15 5µM	+3.644 (7.4)	20 µM	1:4	PBS pH 7.4	Yes	0.65121	Macroscopic phase separation	NA	NA
F3pbs	GH15 5µM	+3.644 (7.4)	25 µM	1:5	PBS pH 7.4	Yes	0.71121	Macroscopic phase separation	NA	NA
F1w-rep1	GH15 5µM	+3.644 (7.4)	15 µM	1:3	water	Yes	0.267786	Opalescent	2539	0.326
F1w-rep2	GH15 5µM	+3.644 (7.4)	15 µM	1:3	water	Yes	0.267786	Opalescent	2487	0.404
F1w-rep3	GH15 5µM	+3.644 (7.4)	15 µM	1:3	water	Yes	0.267786	Opalescent	2462	0.306
F2w-rep1	GH15 5µM	+3.644 (7.4)	20 µM	1:4	water	Yes	0.297786	Opalescent	2921	0.32
F2w-rep2	GH15 5µM	+3.644 (7.4)	20 µM	1:4	water	Yes	0.297786	Opalescent	2937	0.376
F2w-rep3	GH15 5µM	+3.644 (7.4)	20 µM	1:4	water	Yes	0.297786	Opalescent	2924	0.352
F3w-rep1	GH15 5µM	+3.644 (7.4)	25 µM	1:5	water	Yes	0.327786	Opalescent	3188	0.348
F3w-rep2	GH15 5µM	+3.644 (7.4)	25 µM	1:5	water	Yes	0.327786	Opalescent	3367	0.426
F3w-rep3	GH15 5µM	+3.644 (7.4)	25 µM	1:5	water	Yes	0.327786	Opalescent	3357	0.533
F1w-1-rep1	GH15 2.5 µM	+3.644 (7.4)	7.5 µM	1:3	water	Yes	0.222786	Opalescent	884	0.378
F1w-1-rep2	GH15 2.5 µM	+3.644 (7.4)	7.5 µM	1:3	water	Yes	0.222786	Opalescent	901.2	0.371
F1w-1-rep3	GH15 2.5 µM	+3.644 (7.4)	7.5 µM	1:3	water	Yes	0.222786	Opalescent	949.6	0.362
F2w-1-rep1	GH15 2.5 µM	+3.644 (7.4)	10 µM	1:4	water	Yes	0.237786	Opalescent	2014	0.312
F2w-1-rep2	GH15 2.5 µM	+3.644 (7.4)	10 µM	1:4	water	Yes	0.237786	Opalescent	2166	0.36
F2w-1-rep3	GH15 2.5 µM	+3.644 (7.4)	10 µM	1:4	water	Yes	0.237786	Opalescent	2282	0.323
F3w-1-rep1	GH15 2.5 µM	+3.644 (7.4)	12.5 µM	1:5	water	Yes	0.252786	Opalescent	1266	0.371
F3w-1-rep2	GH15 2.5 µM	+3.644 (7.4)	12.5 µM	1:5	water	Yes	0.252786	Opalescent	1332	0.333
F3w-1-rep3	GH15 2.5 µM	+3.644 (7.4)	12.5 µM	1:5	water	Yes	0.252786	Opalescent	1474	0.291
F1w-2-rep1	GH15 1.25 µM	+3.644 (7.4)	3.75 µM	1:3	water	No	0.03322	Opalescent	510.5	0.632
F1w-2-rep2	GH15 1.25 µM	+3.644 (7.4)	3.75 µM	1:3	water	No	0.03322	Opalescent	348.7	0.639
F1w-2-rep3	GH15 1.25 µM	+3.644 (7.4)	3.75 µM	1:3	water	No	0.03322	Opalescent	330	0.524
F1w-2-rep4	GH15 1.25 µM	+3.644 (7.4)	3.75 µM	1:3	water	No	0.03322	Opalescent	323.3	0.524
F1w-2-rep5	GH15 1.25 µM	+3.644 (7.4)	3.75 µM	1:3	water	No	0.03322	Opalescent	332.2	0.553
F2w-2-rep1	GH15 1.25 µM	+3.644 (7.4)	5 µM	1:4	water	No	0.04072	Opalescent	139.4	0.619
F2w-2-rep2	GH15 1.25 µM	+3.644 (7.4)	5 µM	1:4	water	No	0.04072	Opalescent	116.9	0.503
F2w-2-rep3	GH15 1.25 µM	+3.644 (7.4)	5 µM	1:4	water	No	0.04072	Opalescent	119.9	0.472
F2w-2-rep4	GH15 1.25 µM	+3.644 (7.4)	5 µM	1:4	water	No	0.04072	Opalescent	114.9	0.465
F3w-2-rep1	GH15 1.25 µM	+3.644 (7.4)	6.25 µM	1:5	water	No	0.04822	Opalescent	148.3	0.304
F3w-2-rep2	GH15 1.25 µM	+3.644 (7.4)	6.25 µM	1:5	water	No	0.04822	Opalescent	154.5	0.383
F3w-2-rep3	GH15 1.25 µM	+3.644 (7.4)	6.25 µM	1:5	water	No	0.04822	Opalescent	148	0.332
F3w-2-rep4	GH15 1.25 µM	+3.644 (7.4)	6.25 µM	1:5	water	No	0.04822	Opalescent	139.4	0.389
F3w-2-rep5	GH15 1.25 µM	+3.644 (7.4)	6.25 µM	1:5	water	No	0.04822	Opalescent	142	0.32
F3w-2-rep6	GH15 1.25 µM	+3.644 (7.4)	6.25 µM	1:5	water	No	0.04822	Opalescent	155.4	0.406
F4w	M23 1.25µM	+1.654 (7.4)	0	NA	Water	No	0.01072	Macroscopic phase separation	NA	NA
F5hcl	M23 1.25µM	+12.252 (5)	0	NA	HCL	No	0.01073	Macroscopic phase separation	NA	NA
F6hcl-rep1	M23 1.25µM	+25.92 (1.92)	0	NA	HCL	No	0.02272	Transparent	138.4	0.386
F6hcl-rep2	M23 1.25µM	+25.92 (1.92)	0	NA	HCL	No	0.02272	Transparent	176.2	0.432
F6hcl-rep3	M23 1.25µM	+25.92 (1.92)	0	NA	HCL	No	0.02272	Transparent	253	0.484
F6hcl-1-rep1	M23 1.25µM	+25.92 (1.92)	1.25 µM	1:1	HCL	No	0.03022	Opalescent	107.5	0.438
F6hcl-1-rep2	M23 1.25µM	+25.92 (1.92)	1.25 µM	1:1	HCL	No	0.03022	Opalescent	84.76	0.675
F6hcl-1-rep3	M23 1.25µM	+25.92 (1.92)	1.25 µM	1:1	HCL	No	0.03022	Opalescent	77.32	0.707
F6hcl-3-rep1	M23 1.25µM	+25.92 (1.92)	3.75 µM	1:3	HCL	No	0.04522	Opalescent	59.16	0.465
F6hcl-3-rep2	M23 1.25µM	+25.92 (1.92)	3.75 µM	1:3	HCL	No	0.04522	Opalescent	52.51	0.621
F6hcl-3-rep3	M23 1.25µM	+25.92 (1.92)	3.75 µM	1:3	HCL	No	0.04522	Opalescent	58.61	0.513
F6hcl-5-rep1	M23 1.25µM	+25.92 (1.92)	6.25 µM	1:5	HCL	No	0.06022	Opalescent	171.6	0.308
F6hcl-5-rep2	M23 1.25µM	+25.92 (1.92)	6.25 µM	1:5	HCL	No	0.06022	Opalescent	176.7	0.343
F6hcl-5-rep3	M23 1.25µM	+25.92 (1.92)	6.25 µM	1:5	HCL	No	0.06022	Opalescent	185.8	0.354
F6hcl-5-rep4	M23 1.25µM	+25.92 (1.92)	6.25 µM	1:5	HCL	No	0.06022	Opalescent	186.9	0.368
F6hcl-5-rep5	M23 1.25µM	+25.92 (1.92)	6.25 µM	1:5	HCL	No	0.06022	Opalescent	128.9	0.353
F6hcl-5-rep6	M23 1.25µM	+25.92 (1.92)	6.25 µM	1:5	HCL	No	0.06022	Opalescent	131.6	0.33
F6hcl-6-rep1	M23 1.25µM	+25.92 (1.92)	7.5 µM	1:6	HCL	No	0.06772	Opalescent	165.4	0.322
F6hcl-6-rep2	M23 1.25µM	+25.92 (1.92)	7.5 µM	1:6	HCL	No	0.06772	Opalescent	162.7	0.326
F6hcl-6-rep3	M23 1.25µM	+25.92 (1.92)	7.5 µM	1:6	HCL	No	0.06772	Opalescent	164.4	0.304
F6hcl-6-rep4	M23 1.25µM	+25.92 (1.92)	7.5 µM	1:6	HCL	No	0.06772	Opalescent	153.6	0.343
F6hcl-6-rep5	M23 1.25µM	+25.92 (1.92)	7.5 µM	1:6	HCL	No	0.06772	Opalescent	163.2	0.325
F6hcl-6-rep6	M23 1.25µM	+25.92 (1.92)	7.5 µM	1:6	HCL	No	0.06772	Opalescent	165.7	0.357
F6hcl-6-rep7	M23 1.25µM	+25.92 (1.92)	7.5 µM	1:6	HCL	No	0.06772	Opalescent	178.8	0.362
F6hcl-6-rep8	M23 1.25µM	+25.92 (1.92)	7.5 µM	1:6	HCL	No	0.06772	Opalescent	182.1	0.373
F6hcl-7-rep1	M23 1.25µM	+25.92 (1.92)	8.75 µM	1:7	HCL	No	0.07522	Opalescent	224.8	0.251
F6hcl-7-rep2	M23 1.25µM	+25.92 (1.92)	8.75 µM	1:7	HCL	No	0.07522	Opalescent	249.6	0.251
F6hcl-7-rep3	M23 1.25µM	+25.92 (1.92)	8.75 µM	1:7	HCL	No	0.07522	Opalescent	254.7	0.31
F6hcl-7-rep4	M23 1.25µM	+25.92 (1.92)	8.75 µM	1:7	HCL	No	0.07522	Opalescent	201.9	0.21
F6hcl-7-rep5	M23 1.25µM	+25.92 (1.92)	8.75 µM	1:7	HCL	No	0.07522	Opalescent	214.9	0.256
F6hcl-7-rep6	M23 1.25µM	+25.92 (1.92)	8.75 µM	1:7	HCL	No	0.07522	Opalescent	232.2	0.227
F6hcl-7-rep7	M23 1.25µM	+25.92 (1.92)	8.75 µM	1:7	HCL	No	0.07522	Opalescent	219.7	0.265
F6hcl-7-rep8	M23 1.25µM	+25.92 (1.92)	8.75 µM	1:7	HCL	No	0.07522	Opalescent	225.4	0.269
F6hcl-7-rep9	M23 1.25µM	+25.92 (1.92)	8.75 µM	1:7	HCL	No	0.07522	Opalescent	238.4	0.273
