# Supplementary material for: Enzyme-responsive nanoparticles: enhancing the ability of endolysins to eradicate Staphylococcus aureus biofilm
Source: Royal Society of Chemistry journal article supplement (doi:10.1039/d4tb01122h), 2024-01-01
Supplement: d4tb01122h12.xlsx [file d4tb01122h12.xlsx]

## Sheet: PGH-PP-NPs stability over time
Sample code	Cation concentration	PP concentration	Ratio cation to PP (µMol)	Time (h)	Size (nm)	PDI	Zeta potential (mV)
F3w-2-0h-rep1	GH15 1.25 µM	6.25 µM	1:5	0	148.3	0.304	-24.7
F3w-2-0h-rep2	GH15 1.25 µM	6.25 µM	1:5	0	154.5	0.383	-28.3
F3w-2-0h-rep3	GH15 1.25 µM	6.25 µM	1:5	0	148	0.332	-29.7
F3w-2-0h-rep4	GH15 1.25 µM	6.25 µM	1:5	0	139.4	0.389	-27.1
F3w-2-0h-rep5	GH15 1.25 µM	6.25 µM	1:5	0	142	0.32	-29.8
F3w-2-0h-rep6	GH15 1.25 µM	6.25 µM	1:5	0	155.4	0.406	-34.1
F3w-2-0h-rep7	GH15 1.25 µM	6.25 µM	1:5	0	248.8	0.288	-39.9
F3w-2-0h-rep8	GH15 1.25 µM	6.25 µM	1:5	0	238.9	0.639	-44.4
F3w-2-0h-rep9	GH15 1.25 µM	6.25 µM	1:5	0	203.1	0.282	-42.8
F3w-2-0h-rep10	GH15 1.25 µM	6.25 µM	1:5	0	115.5	0.37	-18
F3w-2-0h-rep11	GH15 1.25 µM	6.25 µM	1:5	0	131.8	0.327	-26
F3w-2-0h-rep12	GH15 1.25 µM	6.25 µM	1:5	0	152.4	0.316	-29.9
F3w-2-168h-rep1	GH15 1.25 µM	6.25 µM	1:5	168	195.7	0.468	-35.3
F3w-2-168h-rep2	GH15 1.25 µM	6.25 µM	1:5	168	190.4	0.347	-35.8
F3w-2-168h-rep3	GH15 1.25 µM	6.25 µM	1:5	168	180.7	0.344	-38.7
F3w-2-168h-rep4	GH15 1.25 µM	6.25 µM	1:5	168	143.9	0.317	-23.3
F3w-2-168h-rep5	GH15 1.25 µM	6.25 µM	1:5	168	142	0.369	-24.9
F3w-2-168h-rep6	GH15 1.25 µM	6.25 µM	1:5	168	149.5	0.393	-28.1
F3w-2-336 h-rep1	GH15 1.25 µM	6.25 µM	1:5	336	141.3	0.31	-25.8
F3w-2-336 h-rep2	GH15 1.25 µM	6.25 µM	1:5	336	148.2	0.324	-27.9
F3w-2-336 h-rep3	GH15 1.25 µM	6.25 µM	1:5	336	139.1	0.257	-31.4
F3w-2-720 h-rep1	GH15 1.25 µM	6.25 µM	1:5	720	177.8	0.48	-24.1
F3w-2-720 h-rep2	GH15 1.25 µM	6.25 µM	1:5	720	186.6	0.377	-28.1
F3w-2-720 h-rep3	GH15 1.25 µM	6.25 µM	1:5	720	238.1	0.643	-33.5
F3w-2-720 h-rep4	GH15 1.25 µM	6.25 µM	1:5	720	139.7	0.246	-21.1
F3w-2-720 h-rep5	GH15 1.25 µM	6.25 µM	1:5	720	138.6	0.199	-22.6
F3w-2-720 h-rep6	GH15 1.25 µM	6.25 µM	1:5	720	137.6	0.245	-27.8
F6hcl-7-0-rep1	M23 1.25µM	8.75 µM	1:7	0	219.7	0.265	-29.4
F6hcl-7-rep2	M23 1.25µM	8.75 µM	1:7	0	225.4	0.269	-35.3
F6hcl-7-rep3	M23 1.25µM	8.75 µM	1:7	0	238.4	0.273	-35.6
F6hcl-7-rep4	M23 1.25µM	8.75 µM	1:7	0	213	0.446	-30.8
F6hcl-7-rep5	M23 1.25µM	8.75 µM	1:7	0	253.9	0.383	-34.2
F6hcl-7-rep6	M23 1.25µM	8.75 µM	1:7	0	289.8	0.402	-32.1
F6hcl-7-rep7	M23 1.25µM	8.75 µM	1:7	0	542	0.432	-29.3
F6hcl-7-rep8	M23 1.25µM	8.75 µM	1:7	0	543.2	0.422	-33.7
F6hcl-7-rep9	M23 1.25µM	8.75 µM	1:7	0	538.1	0.415	-36.4
F6hcl-7-rep10	M23 1.25µM	8.75 µM	1:7	0	165.4	0.322	-22.9
F6hcl-7-rep11	M23 1.25µM	8.75 µM	1:7	0	162.7	0.326	-22.6
F6hcl-7-rep12	M23 1.25µM	8.75 µM	1:7	0	164.4	0.304	-23.8
F6hcl-7-rep13	M23 1.25µM	8.75 µM	1:7	0	278	0.275	-30.1
F6hcl-7-rep14	M23 1.25µM	8.75 µM	1:7	0	294	0.275	-34.3
F6hcl-7-rep15	M23 1.25µM	8.75 µM	1:7	0	283.6	0.328	-35.2
F6hcl-7-2.5-rep1	M23 1.25µM	8.75 µM	1:7	2.5	549.7	0.515	-29.9
F6hcl-7-2.5-rep2	M23 1.25µM	8.75 µM	1:7	2.5	548.4	0.498	-35
F6hcl-7-2.5-rep3	M23 1.25µM	8.75 µM	1:7	2.5	591.9	0.466	-35.5
F6hcl-7-2.5-rep4	M23 1.25µM	8.75 µM	1:7	2.5	509.4	0.472	-29.9
F6hcl-7-2.5-rep5	M23 1.25µM	8.75 µM	1:7	2.5	520.9	0.401	-35.4
F6hcl-7-2.5-rep6	M23 1.25µM	8.75 µM	1:7	2.5	542	0.433	-37.1
F6hcl-7-48-rep1	M23 1.25µM	8.75 µM	1:7	48	1958	0.546	-27.8
F6hcl-7-48-rep2	M23 1.25µM	8.75 µM	1:7	48	1382	0.66	-34.4
F6hcl-7-48-rep3	M23 1.25µM	8.75 µM	1:7	48	1452	0.757	-36.2
F6hcl-7-168-rep1	M23 1.25µM	8.75 µM	1:7	168	2377	1	-29.3
F6hcl-7-168-rep2	M23 1.25µM	8.75 µM	1:7	168	1848	1	-33.7
F6hcl-7-168-rep3	M23 1.25µM	8.75 µM	1:7	168	879.9	0.756	-36.4
